# Supplementary material
Source: PubMed Central journal article supplement (PMC6338536)
Supplement: NIHMS972172-supplement-supplement_1.pdf [file NIHMS972172-supplement-supplement_1.pdf]

**Table S1: The association of physical activity and social network in relation to cognitive function at follow-up: Model 3 with all control variables shown**

| VARIABLES                       |                      | R <sup>2</sup>       |
|---------------------------------|----------------------|----------------------|
| Baseline measures               |                      |                      |
| Cognition                       |                      | 0.44 <sup>***</sup>  |
| Moderate physical activity      |                      | 0.02 <sup>*</sup>    |
| High physical activity          |                      | 0.03 <sup>***</sup>  |
| Social network size             |                      | 0.03 <sup>***</sup>  |
| Age                             |                      | -0.17 <sup>***</sup> |
| Gender <sup>a</sup>             |                      | 0.03 <sup>***</sup>  |
| Marital status <sup>a</sup>     |                      | -0.01                |
| Education level <sup>a</sup>    | Secondary            | 0.04 <sup>***</sup>  |
|                                 | Post secondary       | 0.09 <sup>***</sup>  |
| Financial adequacy <sup>a</sup> | With some difficulty | 0.02 <sup>*</sup>    |
|                                 | Fairly easily        | 0.04 <sup>**</sup>   |
|                                 | Easily               | 0.04 <sup>***</sup>  |
| Chronic diseases                |                      | 0.02 <sup>**</sup>   |
| ADL                             |                      | 0.01                 |
| IADL limitations                |                      | -0.09 <sup>***</sup> |
| Perceived health                |                      | 0.05 <sup>***</sup>  |
| Country <sup>a</sup>            | Germany              | 0.01                 |
|                                 | Sweden               | 0.01                 |
|                                 | Spain                | -0.05 <sup>**</sup>  |
|                                 | Italy                | -0.06 <sup>***</sup> |
|                                 | France               | -0.04 <sup>***</sup> |
|                                 | Denmark              | 0.01                 |
|                                 | Switzerland          | 0.01                 |
|                                 | Belgium              | -0.02 <sup>*</sup>   |
|                                 | Czech Republic       | 0.05 <sup>***</sup>  |
|                                 | Poland               | -0.03 <sup>***</sup> |
|                                 | Portugal             | -0.07                |
|                                 | Slovenia             | -0.02 <sup>**</sup>  |
|                                 | Estonia              | -0.04 <sup>***</sup> |
| Observations                    |                      | 16,496               |
| R-squared                       |                      | 0.443                |

a Reference categories: gender (male); marital status (not married or partnered); education level (primary education or less); financial adequacy (with great difficulty), country (Austria) .
